1 **Visuomotor skill learning in young adults with Down syndrome**

2 Laurits Munk Højberg<sup>1\*</sup>, Jesper Lundbye-Jensen<sup>1</sup>, Jacob Wienecke<sup>1,2</sup>

3

4 <sup>1</sup>Movement & Neuroscience, Department of Nutrition Exercise and Sports, University of  
5 Copenhagen, Copenhagen Denmark

6 <sup>2</sup>Norwegian School of Sport Sciences, Oslo, Norway

7

8

9 Corresponding author: Laurits Munk Højberg, Department of Nutrition Exercise and Sports,  
10 University of Copenhagen, Copenhagen, Nørre Allé 51, 2100 København N, Denmark

11 E-mail: [lmh@nexs.ku.dk](mailto:lmh@nexs.ku.dk)

12

13 Keywords: Down Syndrome, Motor learning, Cognition

14

15 Number of words: 5838

16 Number of figures/tables: 5

## 17 **Abstract**

18 *Background:* Individuals with Down syndrome (DS) have impaired general motor skills  
19 compared to typically developed (TD) individuals.

20 *Aims:* To gain knowledge on how young adults with DS learn and retain new motor skills.

21 *Methods and Procedures:* A DS-group (mean age =  $23.9 \pm 3$  years,  $N = 11$ ), and an age-  
22 matched TD-group (mean age  $22.8 \pm 1.8$ ,  $N = 14$ ) were recruited. The participants practiced a  
23 sequence visuomotor accuracy tracking task (VATT). Online and offline effects of practice  
24 were assessed in immediate and 7-day retention tests. Participants practiced the task in seven  
25 blocks (10.6 minutes).

26 *Outcomes and Results:* The TD-group performed better than the DS-group in all blocks (all  $P$   
27  $< 0.001$ ). Both groups improved VATT-performance online from baseline to immediate  
28 retention (all  $P < 0.001$ ). The DS-groups' performance at 7-day retention was at the same  
29 level as the immediate retention tests ( $\Delta DS$ ). An offline decrease in performance was found  
30 in the TD-group ( $\Delta TD$ ,  $P < 0.001$ ). A between-group difference was observed in the offline  
31 effect on the sequence task ( $\Delta TD - \Delta DS$ ,  $P = 0.04$ ).

32 *Conclusions and Implications:* The motor performance of adults with DS is lower compared  
33 to their TD peers. However, adults with DS display significant online performance  
34 improvement during training, and offline consolidation following motor learning.

35

36 **What this paper adds**

37 Learning new motor skills is fundamental throughout our lifespan. Persons with Down  
38 syndrome have other prerequisites for learning new tasks, related to psychological,  
39 physiological, and anatomical factors imposed by the syndrome. This study is the first to  
40 investigate online and offline learning effects of a single motor skill training session in adults  
41 with DS. Our results show generally lower motor performance in DS individuals compared to  
42 the typically developed population, but with equal online learning effects. Both groups  
43 demonstrate retention, i.e., offline stabilisation but while TD demonstrate negative offline  
44 effects, this was not the case for DS. These results should be taken into consideration when  
45 planning training of motor and general life skills for adults with DS. This work lays the  
46 ground for further investigations of the trajectory of the early learning processes and the  
47 mechanisms involved when this target group acquires new skills.

## 48 **1. Introduction**

49 The ability to learn and retain new motor skills is fundamental for everyday functioning, it  
50 allows us to perform movements, to meet the demands of our environment, and adapt to  
51 changes in it (R. A. Schmidt & Lee, 1999). Individuals born with Down syndrome (DS), are  
52 presented with a range of physical and psychological challenges including intellectual  
53 disability (Grieco et al., 2015) and impaired general motor skills (Vicari, 2006), which have  
54 been attributed to altered anatomical, physiological, and neurological development (Dierssen,  
55 2012). Because of this, persons with DS have a higher need for support from health care and  
56 social services throughout their lives (Tsou et al., 2020). Knowledge about the characteristics  
57 of the ability to learn, consolidate and retain new motor skills is valuable for the population  
58 with DS and professionals working with the population. It can lead to improved planning and  
59 structure of motor skill training in the everyday life of individuals with DS (Hall et al., 2011;  
60 Jain et al., 2022).

61 Previous studies have demonstrated that adults with DS can improve their motor  
62 performance during practice (Kerr & Blais, 1985; Reilly et al., 2017), and intervention  
63 studies have shown that the group can improve their gross motor skills over several training  
64 sessions. The latter has been observed as improvements in gait parameters after 10 weeks of  
65 Nordic walking (Skiba et al., 2019) and as improved dribbling skills after 16 weeks of soccer  
66 practice (Perić et al., 2021). These results confirm the ability of skill learning in people with  
67 DS, but the detailed dynamics of online learning (i.e., the change in performance during  
68 practice) and the subsequent offline consolidation and retention of motor skills in adults with  
69 DS, has to our knowledge not yet been investigated.

70 Motor skill learning is a complex process, and it is influenced by a range of factors (Dayan &  
71 Cohen, 2011), e.g., the organization of task practice (Lage et al., 2015), the type and  
72 availability of (augmented) feedback (Oppici et al., 2021) and interindividual differences  
73 such as cognitive abilities (Seidler et al., 2013). Both implicit and explicit memory processes  
74 are involved in motor skill learning (Hikosaka et al., 2002), and age and baseline skill level  
75 seem to influence to which memory system dominate the learning process (Nemeth et al.,  
76 2013). Individuals with DS display impairments in explicit memory, and a relatively  
77 preserved implicit memory (Vicari et al., 2000), and this distinct memory profile could  
78 influence how motor skills are acquired and retained in the population. Motor skill learning is  
79 influenced by individual cognitive abilities such as executive functions (M. Schmidt et al.,  
80 2017) and spatial working memory (Seidler et al., 2013). Part of the intellectual disability

81 profile of individuals with DS is a deficit in these specific functions (Dierssen, 2012;  
82 Lanfranchi et al., 2009), thus the groups' performance on tests probing these abilities could  
83 help explain part of the potential differences in motor skill learning.

84 On the basis on this knowledge, the present paper addresses the questions: What are the  
85 dynamics of online and offline motor skill learning for individuals with DS, and are the  
86 dynamics different from TD individuals? Furthermore, can the potential differences in the  
87 dynamics of motor skill learning be related to differences in cognitive abilities? To address  
88 these questions, a visuomotor accuracy tracking task (VATT), was used. The task involves  
89 control of dynamic pinch force in a precision grip, to track visual targets. We evaluated the  
90 within-session improvement in performance (online effects) as well as the retention seven  
91 days after motor practice (offline effects). We hypothesized that the participants with DS  
92 would show improved motor performance during acquisition and display retention seven  
93 days later. We expected the typically developed (TD) adults to perform better than the DS-  
94 group in the baseline assessment, and that they would display larger online improvements  
95 compared to the DS-group, possibly due to the use of explicit processes dominating early  
96 skill acquisition.

97 The task involved five different targets appearing on the screen in a repeated sequence.  
98 During motor practice, the sequence was colour-coded, i.e., a specific target colour always  
99 appeared in the same position. By implementing two different tests at baseline and retention,  
100 one with the sequenced target order, but without colour-coding and one with a random target  
101 order, we aimed at investigating to what extent improved motor performance could be related  
102 to explicit sequence learning versus improved motor acuity (Shmuelof et al., 2014). The  
103 presence of sequence learning was investigated by comparing the performance in the final  
104 sequenced practice block (with colours), to the performance in the sequenced, non-colour  
105 coded retention block, and by comparing performance in the sequenced and random retention  
106 blocks. We expected to observe sequence learning in the TD-group, due to employment of an  
107 explicit learning strategy, while we expected this to be absent in the DS-group. To investigate  
108 if potential differences in online and offline effects between groups could be related to  
109 specific motor or cognitive abilities, we administered a battery of motor and cognitive tests  
110 and assessment of fine motor skills.

111

## 112 **2. Methods**

113 *2.1 Participants*

114 Twelve adults with Down syndrome (DS-group) and 14 age-matched typically developed  
115 adults (TD-group), were recruited. One participant in the DS-group were excluded, since the  
116 person were not able to complete the training. Participants' characteristics is shown in Table  
117 1. The study was approved by The Danish National Committee on Health and Research  
118 Ethics (H-19017828) and adhered to the Helsinki Declaration II. All participants gave their  
119 informed consent before participation and only participants without guardianship were  
120 included.

121 [Table 1]

122

123 *2.2 Experimental design*

124 Each participant visited the lab twice over the course of one week. On day 0 the participants  
125 completed the baseline, motor practice and immediate retention blocks. Exactly one week  
126 after their first visit, the participants completed 7-day retention tests and additional motor and  
127 cognitive tests.

128

129 *2.3 Visuomotor accuracy tracking task*

130 A computer-based dynamic visuomotor accuracy tracking task (VATT) performed with the  
131 dominant hand was applied. The task has similarities to tasks used in previously published  
132 works from our lab (Beck et al., 2020; Christiansen et al., 2018). The participants were seated  
133 approximately 50 cm from a screen at an adjustable table, which was set to ensure a  
134 comfortable position of the dominant arm. The tables' height was recorded, to ensure  
135 replication on the second visit. The task required the participants to control a cursor to track a  
136 series of target boxes on the monitor, by accurately applying pinch force to a spring-loaded  
137 lever, relaying the force to a load-cell (UU2-K10, Dacell, South Korea) (Figure 1, see also  
138 Larsen et al., 2016). Then the force was low-pass filtered (10 Hz), amplified (x100) (AM-  
139 310, Dacell, South Korea), and then fed the PC through a USB-connected data board,  
140 sampling at 90 Hz (NI USB-6008, National Instruments, Austin, Texas). An in-house  
141 developed Python application ran the VATT. Continuous, online feedback was presented to  
142 the participants, as the cursor changed colour from red to blue, when the targets were hit  
143 correctly. The targets were presented for 2 s, with 0.2 s between targets. The participants

144 were given augmented feedback, as their time on target in percent were displayed for 2 s after  
145 each block. Performance was assessed in two blocks of 59.2 s (27 targets) at baseline,  
146 immediately, and seven days after the training session; a block with a random target order  
147 and a block with five targets appearing in a repeated sequence. At baseline the random block  
148 was performed before the sequence block. The order was reversed at both retention tests. The  
149 participants practiced the sequenced task in 7 blocks of 92.2 s each (42 targets), with a 1-  
150 minute break between blocks. At baseline and retention, all targets were displayed in red.  
151 During practice, the five-target sequence had different colours (augmented information on the  
152 sequence), i.e., the same colour always appeared in the same position. Before the first  
153 baseline block, the participants completed a sequenced familiarization block with red targets  
154 (33 s, 15 targets). The participants were not informed about the differences in block structure.  
155 Between the baseline and practice blocks, the participants were seated in rest for 20 minutes.  
156 Between practice and immediate retention, the participants had a 1-minute break.  
157

158 [Figure 1]

#### 159 *2.4 Visuospatial working memory*

160 We applied a computerized forward span Corsi block tapping task, developed by Aeschlimann  
161 and co-workers (Aeschlimann et al., 2017). The participants were placed in front of a laptop  
162 with a touchscreen with 16 white squares in a 4 by 4 grid. Following a fixation cross, one  
163 square at a time changed colours to black in a quasi-randomized pattern, followed by a  
164 question mark. Then the participants were instructed to tap the same boxes on the screen in  
165 the same order, with their index finger. After an introduction and three practice rounds (two  
166 trials with 2-span tasks and one with a 3-span task), the task commenced at 2 spans. Four  
167 correct answers out of six trials were required to move on to the next level. If this was not  
168 accomplished, the task was terminated.

169

#### 170 *2.5 Basic executive functions*

171 A computerized modified Eriksen flanker task was used to measure basic executive functions  
172 (inhibitory control, processing speed, working memory and flexibility, (Eriksen & Eriksen,  
173 1974)). The flanker task applied in this study was originally developed by Adele Diamonds'  
174 research group (Schonert-Reichl et al., 2015). The participants were seated in front of a

175 laptop with an external keyboard. In the task, images of rows of five fish turning left or right  
176 was displayed, and the participants were instructed to ‘feed the correct fish as quickly as  
177 possible’, either by pressing the left control key with their left index finger or the numpad  
178 enter key with their right index finger, determined by the way the fish was facing. The  
179 buttons were marked with arrows showing the directions (left ctrl = ←, numpad enter = →).  
180 The task contained four trial types, determined by the distractors that were either facing the  
181 same direction (congruent), the opposite direction (incongruent), upwards (neutral), or  
182 without distractors. The task consisted of three sub-tasks: A regular flanker task, a reversed,  
183 and a mixed task. In the regular task the fish were blue, and the participants were instructed  
184 to feed the middle fish. In the reversed task the fish were pink, and the participants were told  
185 to feed the fish on the sides. The mixed task consisted of both blue and pink fish, and the  
186 participants were instructed to feed either the middle or the outside fish, depending on the  
187 colour of the fish. Before each sub-task, the participants completed practice rounds. In the  
188 regular and reversed tasks, the practice round consisted of 4 stimuli. Another practice round  
189 was required if 2 or less trials were correct. The mixed practice round consisted of 8 stimuli,  
190 and another round were performed if a participant got 5 or less correct answers. A maximum  
191 of three practice rounds were allowed for each sub-task. The test was terminated if a  
192 participant failed the third practice round before any the sub-tasks. The regular and reversed  
193 tasks consisted of 17 stimuli each (3 congruent, 10 incongruent, 2 neutral and 2 without  
194 distractors), and the mixed task consisted of 45 trials (12 congruent, 16 incongruent, 9 neutral  
195 and 8 without distractors). The average reaction times (RT) on all trials and the RTs on the  
196 congruent and incongruent trials were extracted as outcomes, as well as the accuracy rates on  
197 the congruent and incongruent trials (correct answers/total number of trials). The flanker  
198 effects were calculated as: incongruent – congruent, both in the RT and accuracy measures.

199

## 200 *2.6 Test of fine motor skills*

201 The Purdue Pegboard test (Lafayette Instrument Company, Lafayette, Indiana, USA) were  
202 performed to measure the participants’ manual dexterity (Tiffin & Asher, 1948). The test  
203 consisted of four sub-tasks: 1) The participants placed as many pins in the board as possible  
204 in 30 seconds with their dominant hand. 2) Similar to 1), but with the non-dominant hand. 3)  
205 The participants worked bimanually and had to place as many pairs of pins as possible in 30  
206 seconds. 4) The assembly task, where the subjects were instructed to build as many



207 assemblies as possible using three different parts in 60 seconds. Before each task, the  
208 experimenter instructed and demonstrated the task, and the participants practiced the task.  
209 Outcomes were the Sum of Scores (the sum of correctly placed pins in sub-task 1), 2), and 3))  
210 and the Assembly score (the number of correctly placed parts in subtask 4)).

211

## 212 *2.7 Data analysis and statistics*

213 All analyses were performed in R statistics (*R Statistics 4.0.0*, 2020). A linear mixed effects  
214 model was fitted to the data (“lme4” R-package (Bates et al., 2015)), to investigate the effect  
215 of time (i.e., the performance on the 13 blocks), group and type of block (sequence or  
216 random) on motor performance. Time on target in seconds, were translated to a score  
217 between 0 and 100 points, with each point being equal to 0.02 s. Group, time, and block type  
218 were included as fixed effects, together with sex and corsiblock span performance (the level  
219 at which the participants failed the test). Sex and corsiblock performance were included to  
220 control for the variation these factors could introduce to the data. Since the participants were  
221 likely to display differences in baseline performance and our experiment is a repeated  
222 measures design, random intercepts were fitted for each participant.

223 (1): Time on target ~ Group x Block x Type + Sex + Corsiblock span number +  
224 (1|participant)

225 The equation above is presented in R-terminology where “(1|participant)” represents the  
226 individual intercepts and the x’es indicates the interactions between the fixed effects of  
227 Group, Block and Type. If significant effects of the interactions between Time on target and  
228 Group and Block (time), were observed, post hoc analyses of within- and between-group  
229 differences were performed. The post hoc analyses investigated differences in online and  
230 offline leaning, and differences in performance between the random and sequence blocks, to  
231 investigate sequence learning. P-values from the post-hoc analyses were corrected for  
232 multiple comparisons with the single step method. Paired T-tests were used to investigate  
233 differences between the groups in the motor and cognitive tests. Unpaired T-tests were used  
234 to determine the presence of flanker effects within the groups. Alpha level was set at  $P <$   
235 0.05, for all analyses. Results from the linear mixed effects model are presented as model  
236 estimated means  $\pm$  standard error (SE). The results of the motor and cognitive test are  
237 presented as mean  $\pm$  SE. Correlation matrixes were computed for each motor and cognitive

238 tests and VATT performance on the sequenced task at baseline and online and offline effects,  
239 and for the absolute motor performance level on day 1 and offline effects.

240

### 241 **3. Results**

#### 242 *3.1 Fine motor skills and cognitive test performance*

243 Paired T-tests showed that the TD-group performed better in the pegboard task and the  
244 corsiblock tapping task compared to the DS group (all P-values < 0.001, Table 2). The results  
245 from the flanker tasks showed that the TD-group had lower reaction times (RT) on the three  
246 sub-tasks, both in the average RT for all trials and on the congruent and incongruent trials  
247 (table 2): Regular flanker (all P-values < 0.001), reversed flanker (all P-values < 0.01) and  
248 mixed flanker (all P-values < 0.05). The TD-group was more accurate on the incongruent  
249 trials in all three tasks compared to the DS group (all P-values < 0.01), but no differences  
250 were observed on the congruent trials. No flanker effects were observed for RT in either of  
251 the groups in the regular flanker (DS-group: P = 0.923, TD-group: P = 0.192). The DS-group  
252 displayed a flanker effect in accuracy in the regular flanker task (P = 0.006), while the TD-  
253 group did not (P = 0.104), this was seen as a significant difference between the groups in the  
254 paired T-test (P < 0.05). In the reversed flanker task, the DS-group presented a flanker effect  
255 on RT (P = 0.025), while the TD-group did not (P = 0.083). The paired t-test revealed a  
256 significant difference in the flanker effect on RT between the groups (P = 0.019). With  
257 regards to accuracy, both groups displayed flanker effects (DS-group: P = 0.045, TD-group:  
258 P = 0.040). In the mixed task, both groups presented flanker effects on RT (DS-group: P =  
259 0.016, TD-group: P = 0.001), and accuracy (DS-group: P < 0.001, TD-group: P = 0.012). The  
260 paired T-tests between the groups showed no difference between the groups in the flanker  
261 effect in RT (P = 0.105), and a significant difference between the groups in the flanker effect  
262 on accuracy (P < 0.001).

263

264 [Table 2]

265

#### 266 *3.2 Motor performance in the VATT*

267 Main effects of both Block (F = 29.6, P < 0.001) and Group were observed (F = 30.1, P <  
268 0.001), so post hoc analyses were performed. The post hoc analyses revealed that the TD-  
269 group performed ~30 points better than the DS group at all timepoints (all P < 0.001),

270 equivalent of 0.6 seconds time on target on each target (Figure 2). A significant effect of sex  
271 was found ( $F = 4.6$ ,  $P = 0.04$ ) in the VATT, while no significant effect of corsiblock  
272 performance were observed ( $P = 0.88$ ).

273

### 274 *3.3 Online effects*

275 Changes in visuomotor performance are presented as changes in time on target score. The  
276 learning curves for both groups are depicted in Figure 2. The improvements in motor  
277 performance within session (online) and between sessions (offline) are shown on Figure 3.  
278 Both the groups improved their online motor performance in the sequence task from baseline  
279 to immediate retention, (immediate retention – baseline,  $\Delta_{\text{online}}$ ) ( $\Delta_{\text{online DS}} = 8.4 \pm 1.7$ ,  $P$   
280  $< 0.001$ ;  $\Delta_{\text{online TD}} = 11.9 \pm 1.5$ ,  $P < 0.001$ , Figure 3 A and B). No difference in online  
281 learning was observed between the groups ( $\Delta_{\text{online TD}} - \Delta_{\text{online DS}}$ ).

282

### 283 *3.4 Retention and Offline effects*

284 Both groups showed retention of the task, as their performances on the 7-day retention tests  
285 were significantly better than their baseline performances on both the sequence (DS:  $7.9 \pm$   
286  $1.7$ ,  $P < 0.001$ , TD:  $5.8 \pm 1.5$ ,  $P < 0.001$ , Figure 3B) and random tasks (DS:  $11.3 \pm 6.7$ ,  $P <$   
287  $0.001$ , TD:  $10.9 \pm 1.5$ ,  $P < 0.001$ , Figure 3B). No difference between the groups was observed  
288 in retention. No difference in motor performance was observed in the DS-group from  
289 immediate to 7-day retention in the sequence task (7-day retention – immediate retention,  
290  $\Delta_{\text{offline}}$ ) ( $\Delta_{\text{offline DS}}: -0.5 \pm 1.7$ ,  $P = 0.995$ , Figure 3C). The TD-group had a significant  
291 offline decrease in performance in the sequence task ( $\Delta_{\text{offline TD}}: -6.1 \pm 1.5$ ,  $P < 0.001$ ,  
292 Figure 3C). A between-group difference was observed in the offline effects in performance in  
293 the sequence task from immediate to 7-day retention ( $\Delta_{\text{offline TD}} - \Delta_{\text{offline DS}}: -5.6 \pm 2.2$   $P$   
294  $= 0.04$ , Figure 3C).

295

296 [Figure 3]

297

### 298 *3.5 Implicit and explicit learning*

299 The amount of explicit sequence learning vs. implicit learning of the task, was investigated  
300 within groups by analysing performance differences between the sequence and colour-coded  
301 practice block 7, and both the sequenced non-colour-coded and the random immediate

302 retention blocks. This was also done between the retention blocks at day 7. No significant  
303 differences in performance within or between groups were observed in these analyses.

304

### 305 *3.6 Correlations between online performance and offline effects*

306 A correlation matrix between motor performance on the immediate retention blocks and the  
307 performance changes from immediate and 7-day retention, showed significant negative  
308 correlations between the offline change in performance on the sequence task and absolute  
309 motor performance in both the random ( $R = -0.48$ ,  $P = 0.020$ ) and the sequence immediate  
310 retention block ( $R = -0.57$ ,  $P = 0.005$ ).

311

### 312 *3.7 Correlations between motor performance and motor and cognitive tests*

313 The correlation matrix for the flanker task showed a significant negative correlation between  
314 baseline VATT performance and reaction time on the congruent trials in the regular flanker  
315 task ( $P = 0.005$ ; Sequence:  $R = -0.75$ ,  $P < 0.001$ ), and a significant positive correlation  
316 between accuracy on the incongruent trials and baseline VATT performance ( $R = 0.68$ ,  $P <$   
317  $0.001$ ). In the flanker effects, we observed significant positive correlations between the  
318 baseline VATT performance and the flanker effects on accuracy on the regular ( $R = 0.46$ ,  $P$   
319  $= 0.031$ ) and mixed flanker task ( $R = 0.75$ ,  $P < 0.001$ ). We did not observe any correlations  
320 between baseline VATT performance and the flanker effects on reaction time. In the  
321 Pegboard task, significant positive correlations were observed between baseline VATT  
322 performance and both Sum of Scores ( $R = 0.78$ ,  $P < 0.001$ ) and Assembly ( $R = 0.85$ ,  $P <$   
323  $0.001$ ). Positive significant correlations were observed between baseline VATT performance  
324 and corsiblock performance (span number:  $R = 0.75$ ,  $P < 0.001$ , correctly answered trials:  $R =$   
325  $0.78$ ,  $P < 0.001$ ). The correlation matrixes also included the online and offline effects. No  
326 correlations were observed between online or offline effects and outcomes from the flanker,  
327 Pegboard or corsiblock tasks ( $P$ -values  $> 0.05$ ).

328

## 329 **4. Discussion**

330 This study is the first to investigate motor skill learning in a task that requires continuous  
331 dynamic control of pinch force in adults with DS, and the first to investigate both online and  
332 offline effects of motor practice.

333

334 *4.1 Online effects and sequence learning*

335 The participants in both the DS- and TD-group demonstrated positive online effects of motor  
336 practice i.e., improved their performance from baseline to immediate retention tests. This  
337 finding is in line with previous studies, which have shown that individuals with DS can  
338 improve their motor performance during practice (de Mello Monteiro et al., 2017; Kerr &  
339 Blais, 1985, 1987). Kerr and Blais used a pursuit tracking task performed with a steering  
340 wheel, which required the participants to accurately move the wheel to a given target location  
341 to investigate probability learning in youths with DS (Kerr & Blais, 1985, 1987). The pursuit  
342 tracking task somewhat resembles the visuomotor tracking element of the VATT in the  
343 present study. The researchers observed online performance improvements as a ~23%  
344 decrease in total trial time in 8 blocks and 800 trials (from ~2300 ms to ~2080 ms) (Kerr &  
345 Blais, 1985), while the present study shows a 40% increase in time on target in 7 blocks with  
346 294 trials (from 17.03 to 23.88, Figure 2). Direct comparisons in the magnitude of the  
347 improvements should be made with care, as the tasks are innately different. The aim of the  
348 pursuit tracking task was to investigate probability learning in persons with DS, not how the  
349 group acquired the motor skill of steering the wheel in a precise manner, while the aim with  
350 the VATT in the present study was to assess changes in the ability to control pinch force.

351 Despite differences in baseline motor performance, the DS- and TD-group showed equal  
352 improvements in online motor performance. No previous study has reported similar findings.  
353 In some previous studies, the age-matched control groups did not improve their performance  
354 in the tasks; they performed at maximum level at the baseline test leaving no further room for  
355 improvement i.e., a ceiling effect (de Mello Monteiro et al., 2017; Kerr & Blais, 1985, 1987).  
356 This discrepancy in online effects between the present and earlier studies could be explained  
357 by differences in task designs, including difficulty levels. For instance, the study by Monteiro  
358 and colleagues applied a prediction reaction time model, which seem to leave very little room  
359 for improvements in the TD-group. The researchers also divided the DS-group into a high  
360 and low performing group based on their baseline scores. They observed that only the low  
361 performing group improved their scores. The requirements for precise pinch force control in  
362 the visuomotor tracking task of the present study, was chosen deliberately, as the aim was to  
363 investigate potential differences in motor skill learning between the groups, and that requires  
364 a task which challenges participants in both groups.

365 In addition to motor acuity, the task of the present study involves a prediction and reaction  
366 element as well; the faster the participants move the cursor to a target when it appears, the

367 higher a score they can obtain. Thus, it could be speculated that part of the differences  
368 between the groups could be attributed to differences in RT and potentially to prediction in  
369 the sequence-based task. To our knowledge no previous study has applied such a model in  
370 individuals with DS. The flanker task used in the present study includes an RT-element.  
371 Here, we find significantly higher RTs on all three tasks in the DS-group compared to the  
372 TD- group, ranging from ~950 ms in the regular task to ~300 ms in the mixed task, which is  
373 in line with previous findings (Davis et al., 1991). This difference in reaction time could  
374 partly explain the difference in VATT-performance of the DS-group and the TD-group,  
375 however, further experiments and analyses are necessary to conclude on the role of  
376 differences in motor reaction time in the VATT.

377 The protocol of the present study was chosen based on pilot experiments, which indicated  
378 that protocols similar to previous studies (e.g., 6 blocks of 3 minutes) was exhausting for the  
379 participants with DS to complete (Beck et al., 2020; Thomas et al., 2016). We expected to  
380 observe sequence learning after exposure to the colored sequence during the seven practice  
381 blocks in the TD-group, as this has been observed previously (Krakauer et al., 2019; Shea et  
382 al., 2006). However, no differences in performance between Block 7 (sequenced and colour-  
383 enhanced) and the sequence block at immediate retention (sequenced, un-coloured), nor  
384 between the sequence and random block at immediate retention was observed in the TD-  
385 group. We did not observe sequence learning within the DS-group as expected. It could be  
386 the reduced amount of total practice time and less exposure to the sequence that is the cause  
387 of the absence of sequence learning in the TD-group. If the participants had been told to be  
388 aware of a sequence in the task, it is possible that sequence learning would have been  
389 observed.

390 The results for online effects demonstrate that individuals with DS improve performance with  
391 motor practice to the same extent as TD individuals. Since initial skill acquisition is  
392 influenced by involvement of cognitive processes and explicit aspects of learning (Krakauer  
393 et al., 2019) we could have expected higher performance gains in the TD-group since this  
394 group is characterized by higher performance in the cognitive tests. This was however not the  
395 case. While the similar online effects between the two groups may be influenced by the  
396 higher baseline performance in the TD-group, it can nevertheless be concluded that DS-group  
397 demonstrate skill acquisition.

398

399 *4.2 Offline effects, consolidation, and retention*

400 To investigate offline effects and retention on motor learning, we employed delayed retention  
401 tests seven days after acquisition of the VATT. The present study is, to the authors  
402 knowledge, the first to apply such a design in adults with DS. Earlier studies have  
403 demonstrated that persons with DS improve both their gross (Almeida et al., 1994; Perić et  
404 al., 2021; Skiba et al., 2019) and fine motor performance (Latash et al., 2002) with several  
405 practice sessions practice. The previous studies did not include performance measures  
406 between sessions; thus, it is not possible to gauge the offline effects or retention of the motor  
407 practice between single sessions. The results of the present study show that adults with DS  
408 exhibit retention on the VATT, as significant increases in motor performance at 7-day  
409 retention compared to the baseline performance. The DS-group exhibited the same level of  
410 retention as the TD-group.  
411 A difference between the groups in the offline changes in motor performance on the sequence  
412 task was observed (Figure 3B). The DS-group maintained their performance from immediate  
413 to 7-day retention, while performance decreased in the TD-group. This difference between  
414 the groups could be explained by the difference in absolute performance, which was  
415 significant on all blocks throughout the study (~0.6 s time on target per target). Indeed, we  
416 observed negative correlations between absolute motor performance on both the retention  
417 blocks on day 1 and the offline change in motor performance in the sequence task, indicating  
418 that a high absolute performance on day 1, correlated with a larger decrease in performance  
419 from immediate to 7-day retention. The TD-group might have reached a performance close to  
420 the ceiling of the task, thus making it less likely for the group to achieve the same level of  
421 performance seven days after the acquisition. Reis and colleagues observed either a  
422 performance maintenance or decrease on a continuous pinch task, suggesting that this offline  
423 pattern might be the default on continuous pinch tasks, contrary to serial tapping tasks, where  
424 offline increases in performance have been observed (Reis et al., 2009; Siengsukon & Al-  
425 Sharman, 2011).  
426 Additionally, the functional task difficulty, i.e., the difference in task difficulty imposed by  
427 differences in skill level of the participants is important to consider (Guadagnoli & Lee,  
428 2004). We observe a significant difference in absolute skill level throughout the experiment,  
429 with the TD-group performing at a higher level. The difficulty level of a task during  
430 acquisition is related to performance level at retention in an inverted U-shaped manner,  
431 where both a too easy and too hard task is detrimental to retention of the task (Akizuki &  
432 Ohashi, 2015). It could be speculated that the task was closer an optimal challenge point for

433 the DS-group, while it was too easy for the TD-group, and thus the negative offline effect  
434 was observed. To address the issue of functional difficulty level, future studies should include  
435 tasks, that are adjusted to ensure the same absolute performance level at baseline, and a  
436 control group that is matched to the same absolute online performance level as the DS-group.  
437 The differences in offline effects between the groups could point to differences in how the  
438 explicit and implicit memory systems are engaged during online motor learning (Robertson et  
439 al., 2004). Previous research has shown that individuals with DS have deficits in explicit  
440 memory and implicit memory abilities comparable to typically developed peers (Vicari et al.,  
441 2000). It could be speculated that the DS-group employs a predominantly implicit learning  
442 strategy during skill acquisition, and that could be part of the reason for the maintained motor  
443 performance observed in the DS-group. The TD-groups' decrease in visuomotor performance  
444 at 7-day retention could indicate the engagement of explicit, cognitive processes that is prone  
445 to interference due to the presentation of competing knowledge during the offline period  
446 (Fletcher et al., 2005). However, we did not find indications of explicit sequence learning on  
447 day 1, which contradicts the notion that it is a loss of explicit knowledge of the sequence that  
448 is the cause of the performance decrease in the TD-group.

449

#### 450 *4.3 Variability in performance and motor and cognitive tests*

451 Several factors could contribute to the difference in general motor performance level between  
452 the groups in the present study. Recent studies have demonstrated increased accuracy and  
453 lower variability in the pinch force task with increased age during neurotypical development  
454 (Beck, Spedden, & Lundbye-Jensen, 2021; Beck, Spedden, Dietz, et al., 2021). Studies  
455 investigating the ability to modulate or hold a specific force output have shown greater  
456 variability and a generally lower force output in individuals with DS (Heffernan et al., 2009;  
457 Rao et al., 2017). In the present study, we observe greater interindividual variability in the  
458 DS-group, than in the TD-group, evident as larger confidence intervals in Time on Target  
459 score (Figure 2). In addition, children and adolescents with DS have a different hand motor  
460 control development with specific grasping characteristics; they generally grasp objects with  
461 fewer fingers and the fingers not used for the actual grasping are often extended (Jover et al.,  
462 2010). These previous findings taken together with the results from the motor and cognitive  
463 tests of the present study, could explain the difference in visuomotor performance observed  
464 between the groups: Higher reaction times along with difficulties in controlling the pinch  
465 force will reduce time on target in the VATT. We observed significant correlations between



466 baseline VATT performance, and performance in the pegboard, corsiblock, and flanker tasks.  
467 This indicates a relation between performance on the VATT, and the skills measured by these  
468 tests, while they also are an expression of the general cognitive and motor challenges related  
469 to DS.

470

#### 471 *4.4 Limitations*

472 An investigation of the presence of explicit knowledge about the motor sequence, e.g., as a  
473 questionnaire would have been advantageous, as it would have provided an indication of  
474 learning strategies. It is important to note that the observed difference between the groups in  
475 offline effects, needs to be investigated further. Indeed, the maintenance of motor  
476 performance in the DS-group seems to be driven by a large offline improvement in one  
477 participant and small improvements in three, while the remaining seven participants reduce  
478 their performance roughly by the same amount as the TD-group (Figure 3C). Despite this, our  
479 data analysis demonstrates a statistically significant difference between the groups. Lastly, it  
480 would have been of interest to have information on the level of severity of the intellectual  
481 disability of the DS-group, as this could to influence the performance of motor tasks  
482 (Gimenez et al., 2017).

483

#### 484 **5. Conclusion**

485 Motor performance in the DS-group was lower compared to the TD-group throughout the  
486 experiment. The groups displayed similar improvements in online motor performance. The  
487 inclusion of a delayed retention test in a motor learning scenario for young adults with DS is  
488 novel and allowed an investigation of how a new motor skill is retained in this population.  
489 Both groups demonstrated significant retention seven days after motor practice. While the  
490 TD-group displayed a decrease in performance at 7-day retention in the sequence task from  
491 the groups' immediate retention performance level, motor performance was maintained in the  
492 DS-group and a difference between the groups was observed. These findings demonstrate  
493 that individuals with DS can indeed acquire and retain motor skills with practice. The cause  
494 for the difference in offline effects between the groups is unclear, but we suggest it is the  
495 result of the difference in absolute performance and functional difficulty level. The results did  
496 not indicate any sequence learning in the groups, as no differences in motor performance

497 between the last sequence-coloured acquisition block and the sequenced non-coloured  
498 retention block or the random retention block were observed.

499

## 500 **Conflicts of interests**

501 The authors have no conflicts of interest, neither economic nor scientific, in relation to this  
502 paper.

503

## 504 **References**

- 505 Aeschlimann, E. A., Voelke, A. E., & Roebbers, C. M. (2017). Short-Term Storage and  
506 Executive Working Memory Processing Predict Fluid Intelligence in Primary School  
507 Children. *Journal of Intelligence*, *5*(2), 17. <https://doi.org/10.3390/jintelligence5020017>
- 508 Akizuki, K., & Ohashi, Y. (2015). Measurement of functional task difficulty during motor  
509 learning: What level of difficulty corresponds to the optimal challenge point? *Human*  
510 *Movement Science*, *43*, 107–117. <https://doi.org/10.1016/J.HUMOV.2015.07.007>
- 511 Almeida, G. L., Corcos, D. M., & Latash, M. L. (1994). Practice and transfer effects during  
512 fast single-joint elbow movements in individuals with Down syndrome. *Physical*  
513 *Therapy*, *74*(11), 1000–1012; discussion 1012-6.  
514 <http://www.ncbi.nlm.nih.gov/pubmed/7972361>
- 515 Bates, D., Mächler, M., Bolker, B., & Walker, S. (2015). Fitting Linear Mixed-Effects  
516 Models Using lme4. *Journal of Statistical Software*, *67*(1).  
517 <https://doi.org/10.18637/jss.v067.i01>
- 518 Beck, M. M., Grandjean, M. U., Hartmand, S., Spedden, M. E., Christiansen, L., Roig, M., &  
519 Lundbye-Jensen, J. (2020). Acute Exercise Protects Newly Formed Motor Memories  
520 Against rTMS-induced Interference Targeting Primary Motor Cortex. *Neuroscience*,  
521 *436*, 110–121. <https://doi.org/10.1016/j.neuroscience.2020.04.016>
- 522 Beck, M. M., Spedden, M. E., Dietz, M. J., Karabanov, A. N., Christensen, M. S., &  
523 Lundbye-Jensen, J. (2021). Cortical signatures of precision grip force control in  
524 children, adolescents, and adults. *ELife*, *10*. <https://doi.org/10.7554/eLife.61018>
- 525 Beck, M. M., Spedden, M. E., & Lundbye-Jensen, J. (2021). Reorganization of functional and  
526 directed corticomuscular connectivity during precision grip from childhood to  
527 adulthood. *Scientific Reports*, *11*(1). <https://doi.org/10.1038/s41598-021-01903-1>
- 528 Christiansen, L., Madsen, M. J., Bojsen-Møller, E., Thomas, R., Nielsen, J. B., & Lundbye-  
529 Jensen, J. (2018). Progressive practice promotes motor learning and repeated transient  
530 increases in corticospinal excitability across multiple days. *Brain Stimulation*, *11*(2),  
531 346–357. <https://doi.org/10.1016/j.brs.2017.11.005>

- 532 Davis, W. E., Sparrow, W. A., & Ward, T. (1991). Fractionated Reaction Times and  
533 Movement Times of Down Syndrome and Other Adults with Mental Retardation.  
534 *Adapted Physical Activity Quarterly*, 8(3), 221–233.  
535 <https://doi.org/10.1123/apaq.8.3.221>
- 536 Dayan, E., & Cohen, L. G. (2011). Neuroplasticity subserving motor skill learning. *Neuron*,  
537 72(3), 443–454. <https://doi.org/10.1016/j.neuron.2011.10.008>
- 538 de Mello Monteiro, C. B., da Silva, T. D., de Abreu, L. C., Fregni, F., de Araujo, L. V.,  
539 Ferreira, F. H. I. B., & Leone, C. (2017). Short-term motor learning through non-  
540 immersive virtual reality task in individuals with down syndrome. *BMC Neurology*,  
541 17(1), 1–8. <https://doi.org/10.1186/s12883-017-0852-z>
- 542 Dierssen, M. (2012). Down syndrome: The brain in trisomic mode. *Nature Reviews*  
543 *Neuroscience*, 13(12), 844–858. <https://doi.org/10.1038/nrn3314>
- 544 Eriksen, B. A., & Eriksen, C. W. (1974). Effects of noise letters upon the identification of a  
545 target letter in a nonsearch task. *Perception & Psychophysics*, 16(1), 143–149.  
546 <https://doi.org/10.3758/BF03203267>
- 547 Fletcher, P. C., Zafiris, O., Frith, C. D., Honey, R. A. E., Corlett, P. R., Zilles, K., & Fink, G.  
548 R. (2005). On the benefits of not trying: Brain activity and connectivity reflecting the  
549 interactions of explicit and implicit sequence learning. *Cerebral Cortex*, 15(7), 1002–  
550 1015. <https://doi.org/10.1093/cercor/bhh201>
- 551 Gimenez, R., Marquezi, M. L., Filho, E. X., & Manoel, E. de J. (2017). A note on motor skill  
552 acquisition in mild and moderate Down syndrome individuals. *Psicologia: Reflexao e*  
553 *Critica*, 30(1), 1–9. <https://doi.org/10.1186/s41155-017-0060-1>
- 554 Grieco, J., Pulsifer, M., Seligsohn, K., Skotko, B., & Schwartz, A. (2015). Down syndrome:  
555 Cognitive and behavioral functioning across the lifespan. *American Journal of Medical*  
556 *Genetics, Part C: Seminars in Medical Genetics*, 169(2), 135–149.  
557 <https://doi.org/10.1002/ajmg.c.31439>
- 558 Guadagnoli, M. A., & Lee, T. D. (2004). Challenge Point: A Framework for Conceptualizing  
559 the Effects of Various Practice Conditions in Motor Learning. *Journal of Motor*  
560 *Behavior*, 36(2), 212–224. <https://doi.org/10.3200/JMBR.36.2.212-224>
- 561 Hall, C. D., Echt, K. v., Wolf, S. L., & Rogers, W. A. (2011). Cognitive and motor  
562 mechanisms underlying older adults' ability to divide attention while walking. *Physical*  
563 *Therapy*, 91(7), 1039–1050. <https://doi.org/10.2522/ptj.20100114>
- 564 Heffernan, K. S., Sosnoff, J. J., Ofori, E., Jae, S. Y., Baynard, T., Collier, S. R., Goulopoulou,  
565 S., Figueroa, A., Woods, J. A., Pitetti, K. H., & Fernhall, B. (2009). Complexity of force  
566 output during static exercise in individuals with Down syndrome. *Journal of Applied*  
567 *Physiology*, 106(4), 1227–1233. <https://doi.org/10.1152/jappphysiol.90555.2008>
- 568 Hikosaka, O., Nakamura, K., Sakai, K., & Nakahara, H. (2002). Central mechanisms of  
569 motor skill learning. *Current Opinion in Neurobiology*, 12(2), 217–222.  
570 [https://doi.org/10.1016/S0959-4388\(02\)00307-0](https://doi.org/10.1016/S0959-4388(02)00307-0)

- 571 Jain, P. D., Nayak, A., Karnad, S. D., & Doctor, K. N. (2022). Gross motor dysfunction and  
572 balance impairments in children and adolescents with Down syndrome: a systematic  
573 review. *Clinical and Experimental Pediatrics*, 65(3), 142–149.  
574 <https://doi.org/10.3345/cep.2021.00479>
- 575 Jover, M., Ayoun, C., Berton, C., & Carlier, M. (2010). Specific grasp characteristics of  
576 children with trisomy 21. *Developmental Psychobiology*, 52(8), 782–793.  
577 <https://doi.org/10.1002/dev.20474>
- 578 Kerr, R., & Blais, C. (1985). Motor skill acquisition by individuals with Down syndrome.  
579 *American Journal of Mental Deficiency*, 90(3), 313–318.  
580 <http://www.ncbi.nlm.nih.gov/pubmed/2934984>
- 581 Kerr, R., & Blais, C. (1987). Down syndrome and extended practice of a complex motor task.  
582 *American Journal of Mental Deficiency*, 91(6), 591–597.  
583 <http://www.ncbi.nlm.nih.gov/pubmed/2954462>
- 584 Krakauer, J. W., Hadjiosif, A. M., Xu, J., Wong, A. L., & Haith, A. M. (2019). Motor  
585 learning. *Comprehensive Physiology*, 9(2), 613–663.  
586 <https://doi.org/10.1002/cphy.c170043>
- 587 Lage, G. M., Ugrinowitsch, H., Apolinário-Souza, T., Vieira, M. M., Albuquerque, M. R., &  
588 Benda, R. N. (2015). Repetition and variation in motor practice: A review of neural  
589 correlates. *Neuroscience and Biobehavioral Reviews*, 57, 132–141.  
590 <https://doi.org/10.1016/j.neubiorev.2015.08.012>
- 591 Lanfranchi, S., Carretti, B., Spanò, G., & Cornoldi, C. (2009). A specific deficit in  
592 visuospatial simultaneous working memory in Down syndrome. *Journal of Intellectual*  
593 *Disability Research*, 53(5), 474–483. <https://doi.org/10.1111/j.1365-2788.2009.01165.x>
- 594 Larsen, L. H., Jensen, T., Christensen, M. S., Lundbye-Jensen, J., Langberg, H., & Nielsen, J.  
595 B. (2016). Changes in corticospinal drive to spinal motoneurons following tablet-based  
596 practice of manual dexterity. *Physiological Reports*, 4(2).  
597 <https://doi.org/10.14814/PHY2.12684>
- 598 Latash, M. L., Kang, N., & Patterson, D. (2002). Finger coordination in persons with Down  
599 syndrome: Atypical patterns of coordination and the effects of practice. *Experimental*  
600 *Brain Research*, 146(3), 345–355. <https://doi.org/10.1007/s00221-002-1189-3>
- 601 Nemeth, D., Janacek, K., & Fiser, J. (2013). Age-dependent and coordinated shift in  
602 performance between implicit and explicit skill learning. *Frontiers in Computational*  
603 *Neuroscience*, 7(OCT), 1–13. <https://doi.org/10.3389/fncom.2013.00147>
- 604 Oppici, L., Dix, A., & Narciss, S. (2021). When is knowledge of performance (KP) superior  
605 to knowledge of results (KR) in promoting motor skill learning? A systematic review.  
606 *International Review of Sport and Exercise Psychology*, 0(0), 1–25.  
607 <https://doi.org/10.1080/1750984X.2021.1986849>
- 608 Perić, D. B., Miličević-Marinković, B., & Djurović, D. (2021). The effect of the adapted  
609 soccer programme on motor learning and psychosocial behaviour in adolescents with

- 610 Down syndrome. *Journal of Intellectual Disability Research*, 50, 1–12.  
611 <https://doi.org/10.1111/jir.12881>
- 612 *R statistics 4.0.0*. (2020). R Core Team. <https://www.r-project.org/>
- 613 Rao, P. T., Guddattu, V., & Solomon, J. M. (2017). Response abilities of children with Down  
614 Syndrome and other intellectual developmental disorders. *Experimental Brain Research*,  
615 235(5), 1411–1427. <https://doi.org/10.1007/s00221-017-4889-4>
- 616 Reilly, N., Lawrence, G. P., Mottram, T., & Khan, M. (2017). Adults with Down syndrome  
617 demonstrate peripheral, not central, deficits when integrating movements during  
618 multiple-target sequences. *Journal of Motor Learning and Development*, 5(1), 82–102.  
619 <https://doi.org/10.1123/jmld.2015-0045>
- 620 Reis, J., Schambra, H. M., Cohen, L. G., Buch, E. R., Fritsch, B., Zarahn, E., Celnik, P. A., &  
621 Krakauer, J. W. (2009). Noninvasive cortical stimulation enhances motor skill  
622 acquisition over multiple days through an effect on consolidation. In *PNAS February*  
623 (Vol. 3, Issue 5).  
624 [www.pnas.org/cgi/content/full/0805413106/DCSupplemental](http://www.pnas.org/cgi/content/full/0805413106/DCSupplemental).[www.pnas.org/cgi/doi/10.1073/pnas.0805413106](http://www.pnas.org/cgi/doi/10.1073/pnas.0805413106)
- 626 Robertson, E. M., Pascual-Leone, A., & Press, D. Z. (2004). Awareness Modifies the Skill-  
627 Learning Benefits of Sleep. *Current Biology*, 14(3), 208–212.  
628 <https://doi.org/10.1016/J.CUB.2004.01.027>
- 629 Schmidt, M., Egger, F., Benzing, V., Jäger, K., Conzelmann, A., Roebbers, C. M., & Pesce, C.  
630 (2017). Disentangling the relationship between children’s motor ability, executive  
631 function and academic achievement. *PLoS ONE*, 12(8).  
632 <https://doi.org/10.1371/journal.pone.0182845>
- 633 Schmidt, R. A., & Lee, T. D. (1999). Glossary. In *Motor Control and Learning: A Behavioral*  
634 *Emphasis* (3rd ed., pp. 411–421). Human Kinetics.
- 635 Schonert-Reichl, K. A., Oberle, E., Lawlor, M. S., Abbott, D., Thomson, K., Oberlander, T.  
636 F., & Diamond, A. (2015). Enhancing cognitive and social-emotional development  
637 through a simple-to-administer mindfulness-based school program for elementary school  
638 children: A randomized controlled trial. *Developmental Psychology*, 51(1), 52–66.  
639 <https://doi.org/10.1037/A0038454>
- 640 Seidler, R. D., Bo, J., & Anguera, J. A. (2013). Neurocognitive Contributions to Motor Skill  
641 Learning: The Role of Working Memory. *Journal of Motor Behavior*, 44(6), 445–453.  
642 <https://doi.org/10.1080/00222895.2012.672348>.Neurocognitive
- 643 Shea, C. H., Park, J.-H., & Wilde Braden, H. (2006). Age-Related Effects in Sequential  
644 Motor Learning. *Physical Therapy*, 86(4), 478–488. <https://doi.org/10.1093/ptj/86.4.478>
- 645 Shmuelof, L., Yang, J., Caffo, B., Mazzoni, P., & Krakauer, J. W. (2014). The neural  
646 correlates of learned motor acuity. *J Neurophysiol*, 112, 971–980.  
647 <https://doi.org/10.1152/jn.00897.2013.-We>

- 648 Siengsukon, C., & Al-Sharman, A. (2011). Sleep promotes offline enhancement of an  
649 explicitly learned discrete but not an explicitly learned continuous task. *Nature and*  
650 *Science of Sleep, Volume 3*, 39–46. <https://doi.org/10.2147/NSS.S20063>
- 651 Skiba, A., Marchewka, J., Skiba, A., Podsiadło, S., Sulowska, I., Chwała, W., & Marchewka,  
652 A. (2019). Evaluation of the Effectiveness of Nordic Walking Training in Improving the  
653 Gait of Persons with Down Syndrome. *BioMed Research International, 2019*.  
654 <https://doi.org/10.1155/2019/6353292>
- 655 Thomas, R., Beck, M. M., Lind, R. R., Korsgaard Johnsen, L., Geertsen, S. S., Christiansen,  
656 L., Ritz, C., Roig, M., & Lundbye-Jensen, J. (2016). Acute Exercise and Motor Memory  
657 Consolidation: The Role of Exercise Timing. *Neural Plasticity, 2016*.  
658 <https://doi.org/10.1155/2016/6205452>
- 659 Tiffin, J., & Asher, E. J. (1948). The Purdue Pegboard: norms and studies of reliability and  
660 validity. *Journal of Applied Psychology, 32*(3), 234–247.  
661 <https://doi.org/10.1037/h0061266>
- 662 Tsou, A. Y., Bulova, P., Capone, G., Chicoine, B., Gelaro, B., Harville, T. O., Martin, B. A.,  
663 McGuire, D. E., McKelvey, K. D., Peterson, M., Tyler, C., Wells, M., & Whitten, M. S.  
664 (2020). Medical Care of Adults with down Syndrome: A Clinical Guideline. *JAMA -*  
665 *Journal of the American Medical Association, 324*(15), 1543–1556.  
666 <https://doi.org/10.1001/jama.2020.17024>
- 667 Vicari, S. (2006). Motor development and neuropsychological patterns in persons with Down  
668 syndrome. *Behavior Genetics, 36*(3), 355–364. [https://doi.org/10.1007/s10519-006-](https://doi.org/10.1007/s10519-006-9057-8)  
669 [9057-8](https://doi.org/10.1007/s10519-006-9057-8)
- 670 Vicari, S., Bellucci, S., & Carlesimo, G. A. (2000). Implicit and explicit memory: A  
671 functional dissociation in persons with Down syndrome. *Neuropsychologia, 38*(3), 240–  
672 251. [https://doi.org/10.1016/S0028-3932\(99\)00081-0](https://doi.org/10.1016/S0028-3932(99)00081-0)
- 673
- 674

675 **Tables and figures**

676

**Table 1: Demographic data of the participants**

| Variables              | DS             | TD             |
|------------------------|----------------|----------------|
| Number of participants | 11             | 14             |
| Sex (f/m)              | 3/8            | 6/8            |
| Age (years $\pm$ SD)   | 23.9 $\pm$ 3.0 | 22.8 $\pm$ 1.8 |

677

**Table 2: Outcomes of the motor and cognitive tests**

| Variables                        | DS      |      | TD      |     | Sig. level |
|----------------------------------|---------|------|---------|-----|------------|
| <b>Pegboard</b>                  |         |      |         |     |            |
| Sum of scores                    | 18.5 ±  | 1.7  | 39.2 ±  | 1.0 | ***        |
| Assembly                         | 13.1 ±  | 1.3  | 43.7 ±  | 1.4 | ***        |
| <b>Flanker test</b>              |         |      |         |     |            |
| Regular RT all (ms)              | 1400 ±  | 160  | 464 ±   | 17  | ***        |
| Regular congruent RT (ms)        | 1376 ±  | 176  | 469 ±   | 22  | ***        |
| Regular incongruent RT (ms)      | 1406 ±  | 160  | 454 ±   | 16  | ***        |
| Regular congruent acc.           | 0.83 ±  | 0.07 | 1 ±     | 0   |            |
| Regular incongruent acc.         | 0.45 ±  | 0.11 | 0.96 ±  | 0   | **         |
| Regular flanker effect RT (ms)   | 26 ±    | 123  | -16 ±   | 13  |            |
| Regular flanker effect acc.      | -0.38 ± | 0.11 | 0.04 ±  | 0   | *          |
| Reversed RT all (ms)             | 1299 ±  | 123  | 439 ±   | 132 | ***        |
| Reversed congruent RT (ms)       | 1101 ±  | 1587 | 471 ±   | 26  | **         |
| Reversed incongruent RT (ms)     | 1338 ±  | 126  | 446 ±   | 19  | ***        |
| Reversed congruent acc.          | 0.93 ±  | 0.06 | 1 ±     | 0   |            |
| Reversed incongruent acc.        | 0.82 ±  | 0.04 | 0.98 ±  | 0   | **         |
| Reversed, flanker effect RT (ms) | 290 ±   | 115  | -25 ±   | 9   | *          |
| Reversed, flanker effect, acc.   | -0.11 ± | 0.06 | -0.02 ± | 0   |            |
| Mixed, RT all (ms)               | 1085 ±  | 77   | 730 ±   | 35  | **         |
| Mixed congruent RT (ms)          | 934 ±   | 577  | 683 ±   | 35  | **         |
| Mixed incongruent RT (ms)        | 1198 ±  | 125  | 799 ±   | 38  | *          |
| Mixed, congruent acc.            | 0.92 ±  | 0.05 | 0.97 ±  | 0   |            |
| Mixed, incongruent acc.          | 0.47 ±  | 0.06 | 0.92 ±  | 0   | ***        |
| Mixed flanker effect, RT (ms)    | 268 ±   | 104  | 117 ±   | 27  |            |
| Mixed flanker effect, acc.       | -0.45 ± | 0.04 | -0.05 ± | 0   | ***        |
| <b>Corsiblock tapping task</b>   |         |      |         |     |            |
| Span number                      | 2.8 ±   | 0.4  | 6.4 ±   | 0.4 | ***        |
| Correct answers                  | 6.9 ±   | 1.8  | 26.5 ±  | 1.7 | ***        |

678 Sum of scores = The sum of pins placed with the right, left and both hands in three separate  
679 trails. Assembly score = The number of correctly placed parts in the assembly task. RT =  
680 Reaction time. Acc. = Accuracy ratio, calculated as number of correctly answered trials divided  
681 by the number of total trials. Flanker effect RT = Reaction time in the congruent trials  
682 subtracted from the reaction time in incongruent trials. Flanker effect acc. = Accuracy ratio in  
683 the congruent trials subtracted from the accuracy ratio in the incongruent trials. Corsiblock  
684 Span number = The number of spans at which the participants failed the task. Correct  
685 answers = The number of correctly performed trials. Data is presented as means ± SE. Stars  
686 indicate the P-values of the paired T-tests between the groups. Significance codes: "\*" denotes  
687 denotes  $p < 0.05$ , "\*\*\*" denotes  $p < 0.01$ , "\*\*\*\*" denotes  $p < 0.001$ .



688

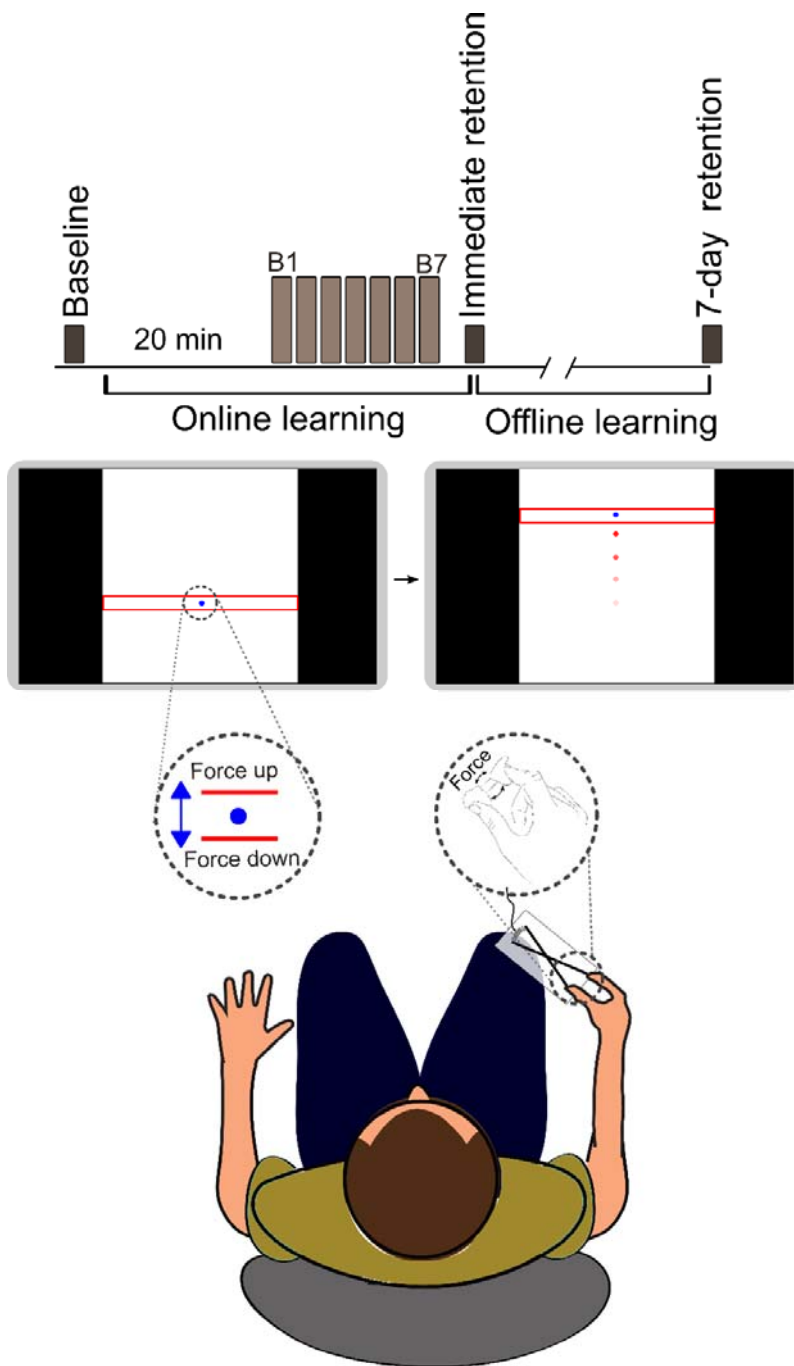

689

690 **Figure 1:** Outline of the VATT and study protocol of the current study. The underarms are  
691 resting on an adjustable table, to ensure a comfortable position.

692

693

694

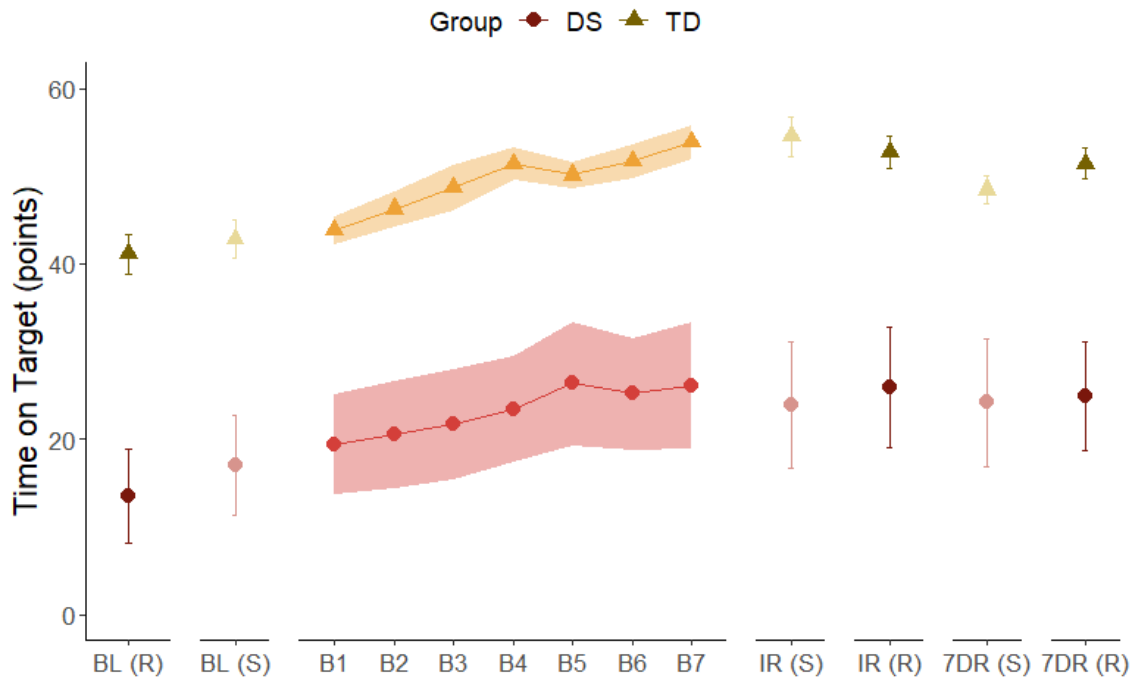

695

696 **Figure 2: Motor Performance at baseline, during acquisition and at retention tests.**

697 Motor performance as percentage points (pp) time on target on all blocks. Black and grey

698 colours indicate random and sequence blocks at baseline, immediate and 7-day retention,

699 respectively. Coloured blocks indicate acquisition blocks. Error bars and ribbons represent

700 error as confidence intervals. Abbreviations: BL = Baseline; IR = Immediate retention; 7DR

701 = 7-day retention, (S) = Sequence; (R) = Random.

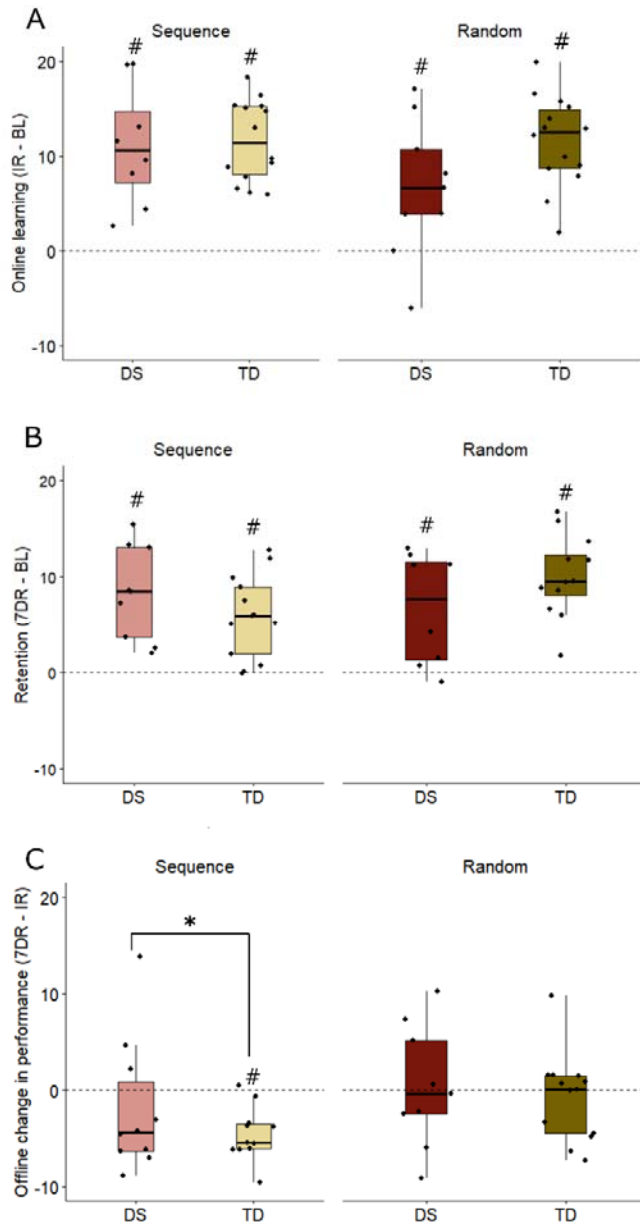

702

703 **Figure 3:** Online and offline effects. Box plots with individual values displaying changes in  
704 performance on both the sequenced and random tasks. (A) online performance change from  
705 baseline to immediate retention, (B) retention of the VATT, measured as performance  
706 changes from baseline to 7-day retention, and (C) offline change in performance from  
707 immediate to 7-day retention. The dotted lines at 0 on the y-axis is equal to the groups' motor  
708 performance on the baseline blocks (A and B) and immediate retention blocks (C). BL =  
709 Baseline, IR = Immediate retention, 7DR= 7-day retention. # = Significant within-group  
710 difference. \* = Significant between-group difference in the relative changes.
